# Supplementary material for: Grazing increases litter decomposition rate but decreases nitrogen release rate in an alpine meadow
Source: Copernicus journal article supplement (doi:10.5194/bg-15-4233-2018), 2018-07-12
Supplement: Supplementary file 1 [file bg-15-4233-2018-supplement.pdf]

Supplement of Biogeosciences, 15, 4233–4243, 2018  
<https://doi.org/10.5194/bg-15-4233-2018-supplement>  
© Author(s) 2018. This work is distributed under  
the Creative Commons Attribution 4.0 License.

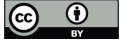

*Supplement of*

## **Grazing increases litter decomposition rate but decreases nitrogen release rate in an alpine meadow**

**Yi Sun et al.**

*Correspondence to:* Fujiang Hou (cyhoufj@lzu.edu.cn)

The copyright of individual parts of the supplement might differ from the CC BY 4.0 License.

Supplemental figures

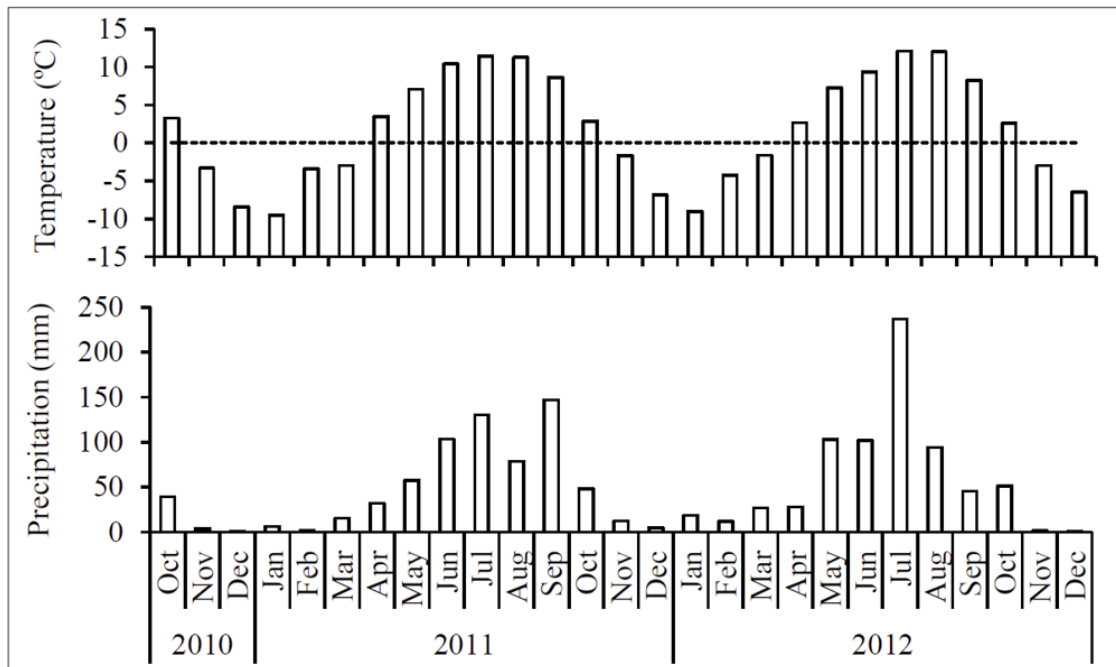

Figure S1. Mean temperature (°C) and total precipitation (mm) during experiments.

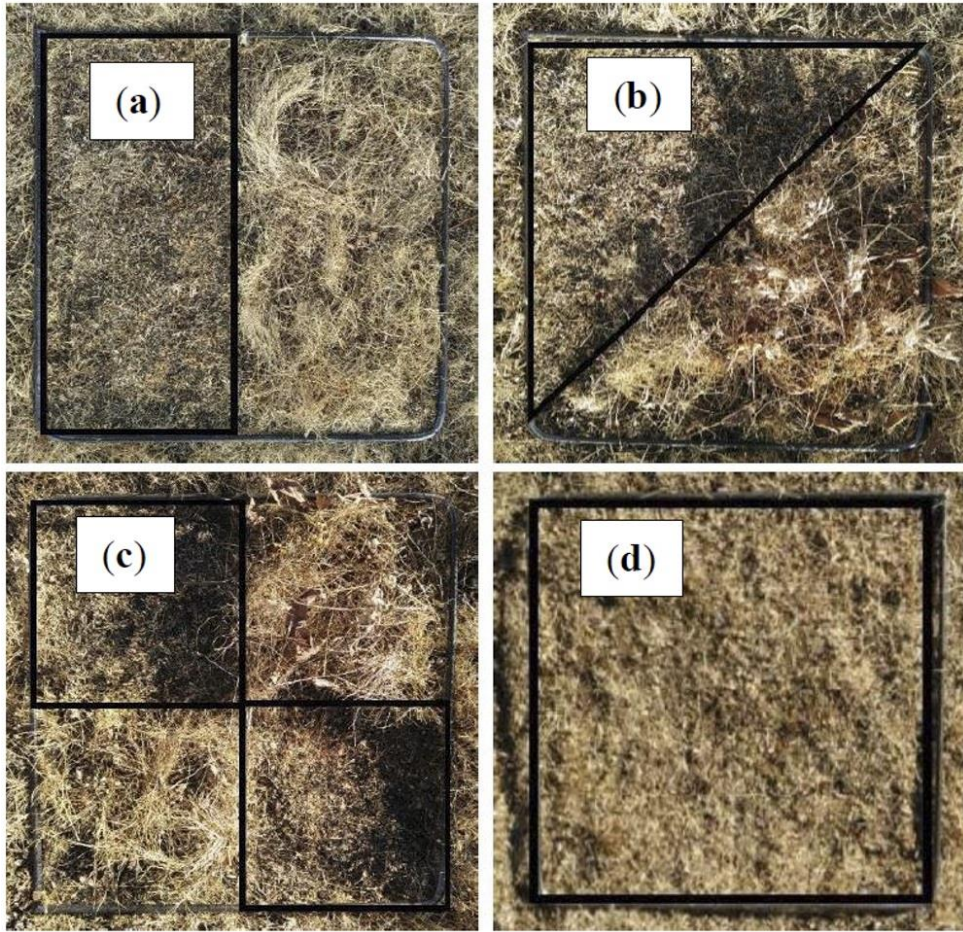

**Figure S2.** Field sampling methods: (a) half alongside, (b) half along diagonal, (c) two sub-quarters along diagonal, and (d) additional quarter for supplementary litter collection to make up 20 g in quarter a, b or c.

## Supplemental table

**Table S1.** The list of all species in grazing and grazing exclusion paddocks (Niu et al., 2009, 2010; Wu et al., 2009).

| Species                             | Palatability | Functional group | Species                        | Palatability | Functional group |
|-------------------------------------|--------------|------------------|--------------------------------|--------------|------------------|
| <i>Agrostis hugoniana</i>           | P            | GG               | <i>Euphorbia esula</i>         | UP           | FG               |
| <i>Agrostis micrantha</i>           | P            | GG               | <i>Euphrasia regelii</i>       | UP           | FG               |
| <i>Allium sikkimense</i>            | P            | FG               | <i>Gentiana macrophylla*</i>   | UP           | FG               |
| <i>Astragalus polycladus</i>        | P            | LG               | <i>Gentiana sino-ornata</i>    | UP           | FG               |
| <i>Blysmus sinocompressus</i>       | P            | SG               | <i>Gentianopsis barbata</i>    | UP           | FG               |
| <i>Carex brunnescens</i>            | P            | SG               | <i>Geranium wilfordii</i>      | UP           | FG               |
| <b><i>Elymus nutans</i></b>         | P            | GG               | <i>Halenia elliptica</i>       | UP           | FG               |
| <i>Festuca sinensis</i>             | P            | GG               | <i>Lamiophlomis rotata</i>     | UP           | FG               |
| <i>Gueldenstaedtia diversifolia</i> | P            | LG               | <i>Lancea tibetica</i>         | UP           | FG               |
| <b><i>Kobresia graminifolia</i></b> | P            | SG               | <i>Leontopodium souliei</i>    | UP           | FG               |
| <i>Kobresia humilis</i>             | P            | SG               | <i>Ligularia virgaurea</i>     | UP           | FG               |
| <i>Kobresia kansuensis</i>          | P            | SG               | <i>Oxytropis kansuensis</i>    | UP           | LG               |
| <i>Kobresia tibetica</i>            | P            | SG               | <i>Parnassia palustris</i>     | UP           | FG               |
| <i>Plantago depressa</i>            | P            | FG               | <i>Pleurospermum pulszkyi</i>  | UP           | FG               |
| <b><i>Poa chalarantha</i></b>       | P            | GG               | <i>Polygonum viviparum</i>     | UP           | FG               |
| <i>Poa poophagorum</i>              | P            | GG               | <i>Potentilla anserine</i>     | UP           | FG               |
| <i>Potentilla fragarioides</i>      | P            | FG               | <i>Ranunculus tanguticus</i>   | UP           | FG               |
| <b><i>Roegneria nutans</i></b>      | P            | SG               | <i>Rumex patientia</i>         | UP           | FG               |
| <i>Scirpus pumilus</i>              | P            | SG               | <i>Saussurea hieracoides</i>   | UP           | FG               |
| <b><i>Stipa aliena</i></b>          | P            | GG               | <i>Saussurea pachyneura</i>    | UP           | FG               |
| <i>Anaphalis lactea</i>             | UP           | FG               | <i>Saussurea stella</i>        | UP           | FG               |
| <i>Anemone obtusiloba</i>           | UP           | FG               | <i>Swertia bimaculata</i>      | UP           | FG               |
| <b><i>Anemone rioularis</i></b>     | UP           | FG               | <i>Thalictum alpinum</i>       | UP           | FG               |
| <i>Anemone trullifolia</i>          | UP           | FG               | <i>Thermopsis lanceolata</i>   | UP           | LG               |
| <i>Arenaria serpyllifolia</i>       | UP           | FG               | <i>Thlaspi arvense</i>         | UP           | FG               |
| <i>Aster alpinus</i>                | UP           | FG               | <b><i>Trollius farreri</i></b> | UP           | FG               |
| <i>Cerastium arvense</i>            | UP           | FG               | <i>Veronica eriogyne</i>       | UP           | FG               |
| <i>Cremanthodium lineare</i>        | UP           | FG               |                                |              |                  |

Bold font indicates the dominant species. P, palatable species; UP, unpalatable species; GG, group of grass species; SG, group of sedge species; LG, group of leguminous species; FG, group of forbs species; \**G. macrophylla* presented in GP only.
